# Supplementary material for: Solution-based low-temperature CsPbI3 nanoparticle perovskite solar cells
Source: Royal Society of Chemistry journal article supplement (doi:10.1039/d1ma00802a), 2021-12-21
Supplement: d1ma00802a1.pdf [file d1ma00802a1.pdf]

### Solution based low temperature CsPbI<sub>3</sub> nanoparticles perovskite solar cells

Adva Shpatz Dayan<sup>1</sup>, Stav Rahmany<sup>1</sup>, Flatken Marion<sup>2</sup>, Tal Binyamin<sup>1</sup>, Armin Hoell<sup>2</sup>, Antonio Abate<sup>2</sup>, Lioz Etgar<sup>1,\*</sup>

<sup>1</sup> Institute of Chemistry, Casali Center for Applied Chemistry, The Hebrew University of Jerusalem, Jerusalem 91904, Israel.

<sup>2</sup> Helmholtz-Zentrum Berlin für Materialien und Energie GmbH, Hahn-Meitner-Platz 1, 14109 Berlin, Germany

\* [lioz.etgar@mail.huji.ac.il](mailto:lioz.etgar@mail.huji.ac.il)

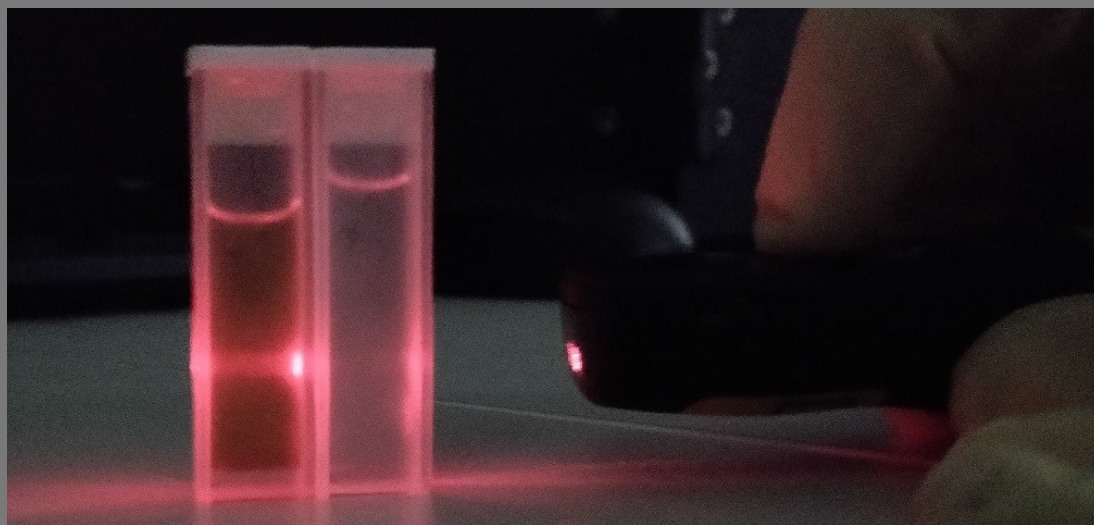

**Figure S1.** Demonstration of the tyndall effect by a lesser beam that was transfer through CsPbI<sub>3</sub> solutions before (right) and after (left) heating treatment.

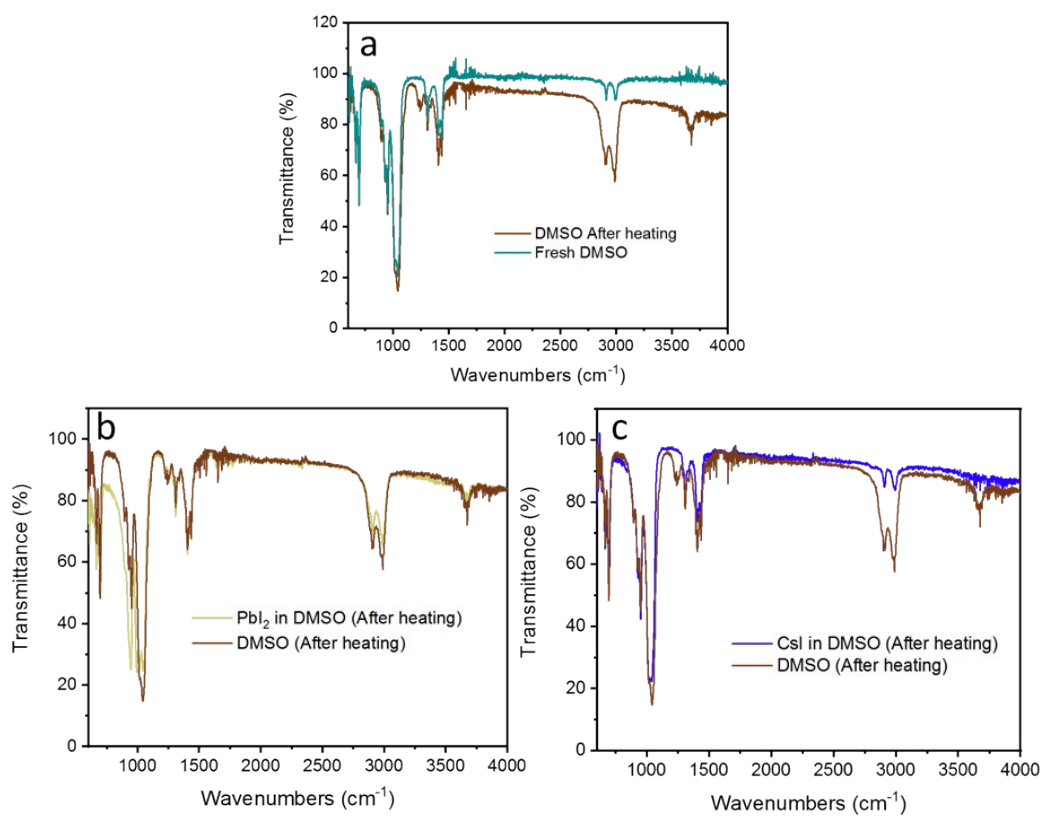

**Fig S2.** Fourier Transform Infrared (FTIR) Spectroscopy of (a) Fresh DMSO and DMSO after heating to 180 °C for 72 h (b) Only PbI<sub>2</sub> in DMSO heating to 180 °C for 72 h compare to heated DMSO (c) Only CsI in DMSO heating to 180 °C for 72 h compare to heated DMSO.

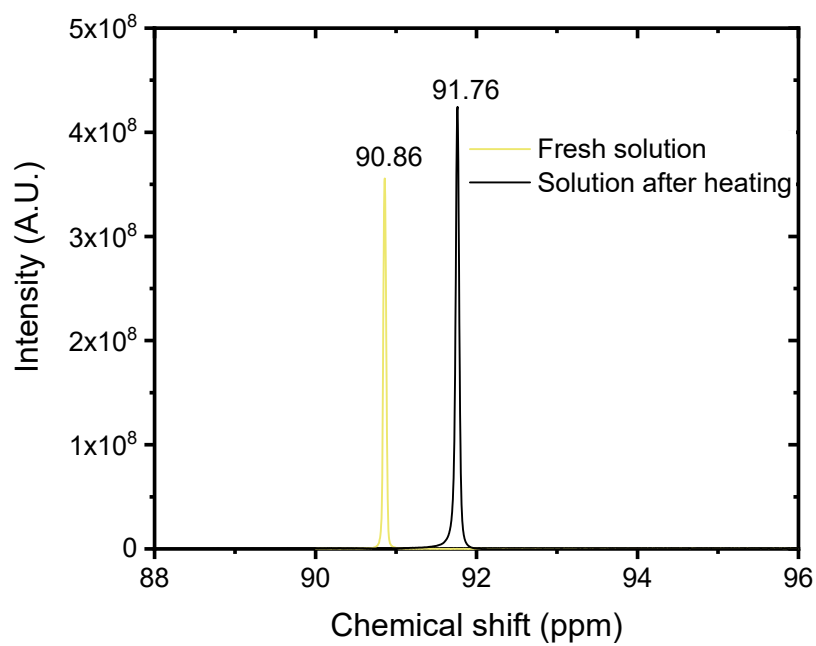

**Fig S3.**  $^{133}\text{Cs}$  NMR spectrum of  $\text{CsPbI}_3$  solution before and after heating.

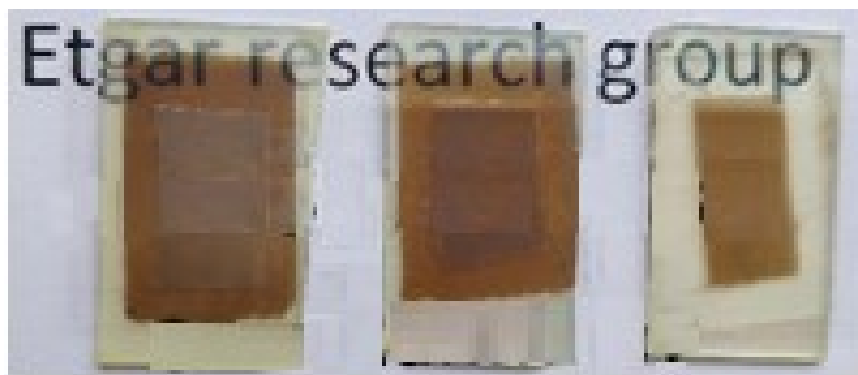

**Fig S4.** Photos of the  $\text{CsPbI}_3$  films after annealing at  $55^\circ\text{C}$

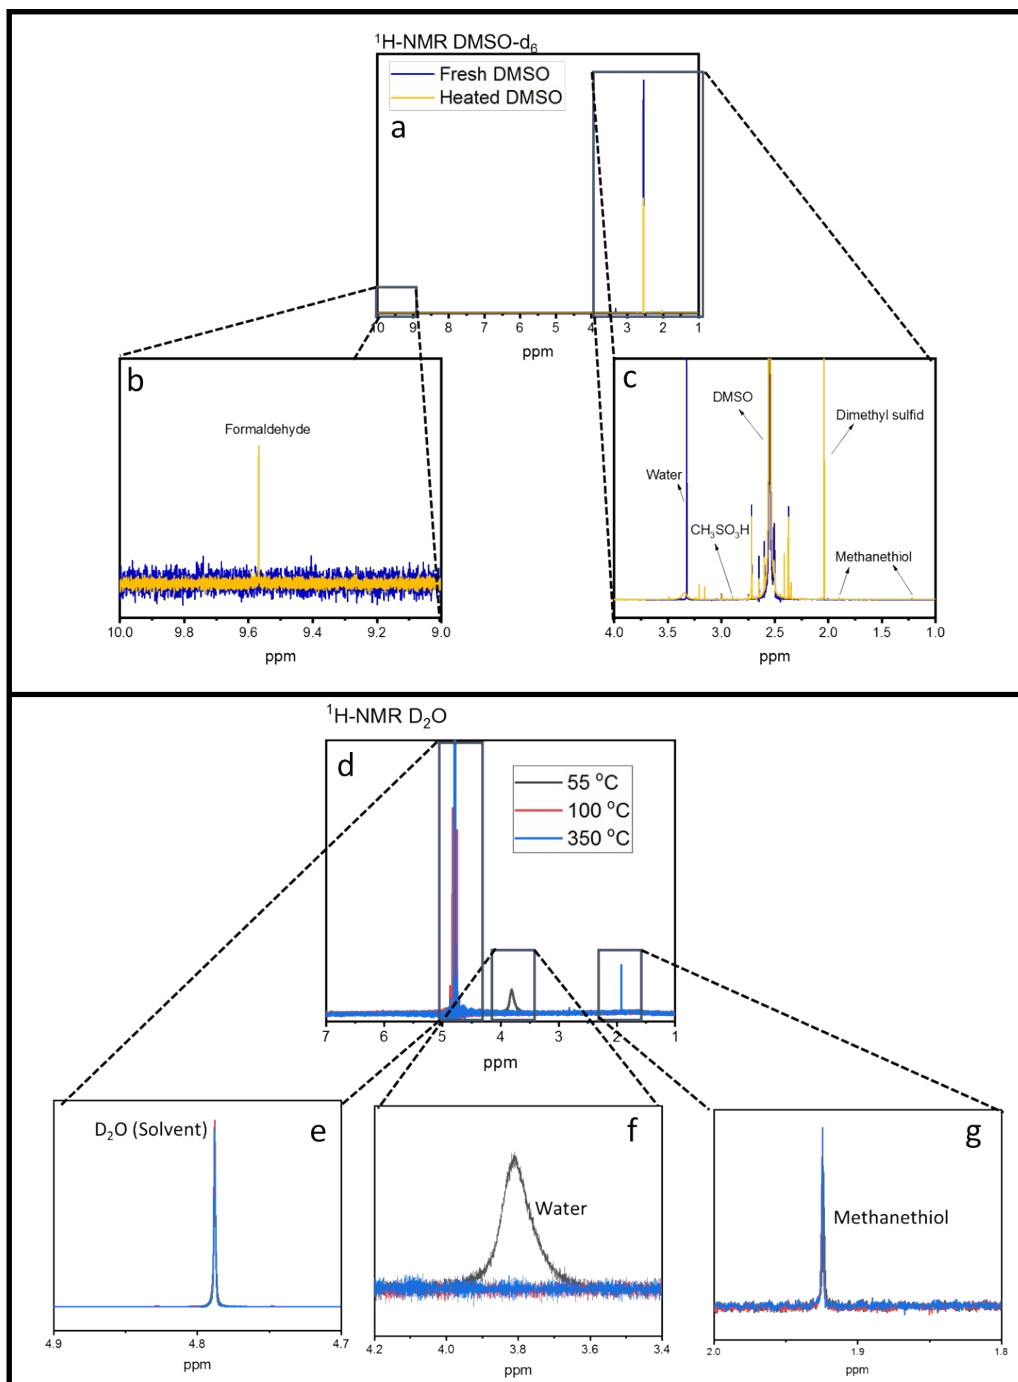

**Fig S5.** (a)  $^1\text{H-NMR}$  (DMSO- $d_6$  as solvent) of fresh DMSO (blue) and DMSO after heating (yellow) (b) magnification of 1-4 ppm (c) magnification of 9-10 ppm. (d)  $^1\text{H-NMR}$  ( $\text{D}_2\text{O}$  as solvent) of films under annealing process at different temperatures 55 °C (gray), 100 °C (red) and 350 °C (blue) (e) magnification of 4.7-4.9 ppm (f) magnification of 3.4-4.2 ppm and (g) magnification of 1.8-2.0 ppm

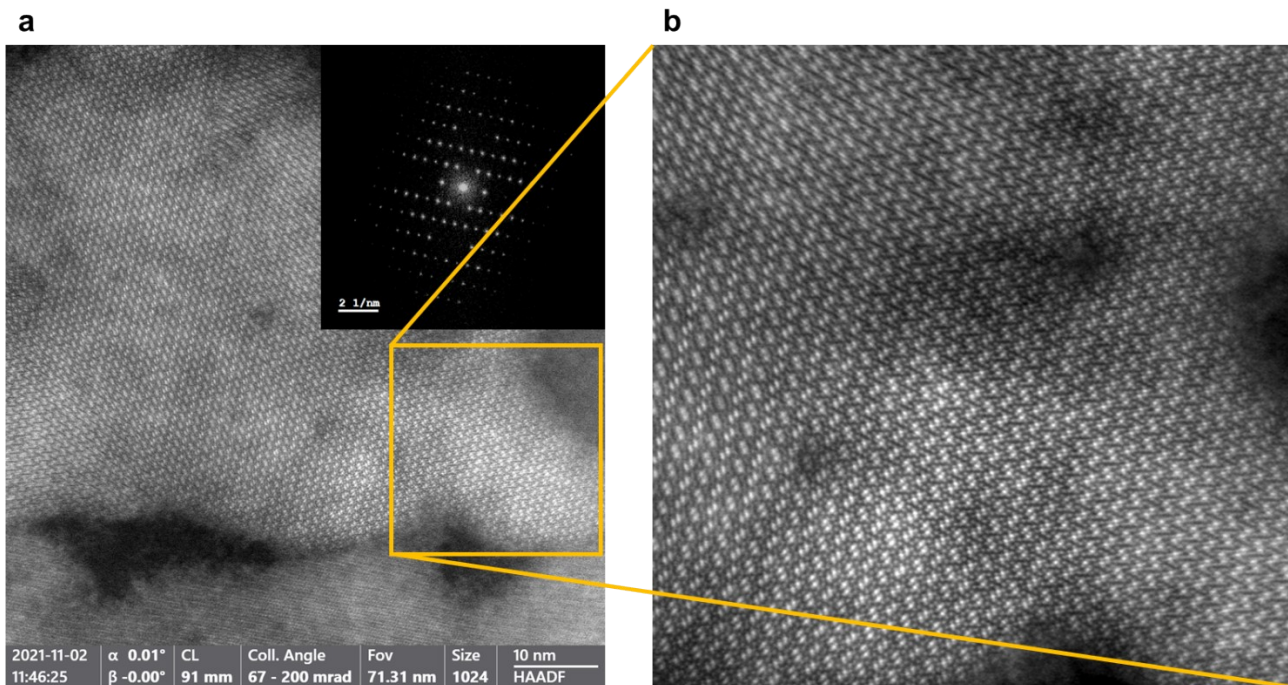

**Figure S6.** (a) HAADF STEM of CsPbI<sub>3</sub> NPs. Inset: FFT image of the corresponding sample. (b) magnification of a specific area in the sample.

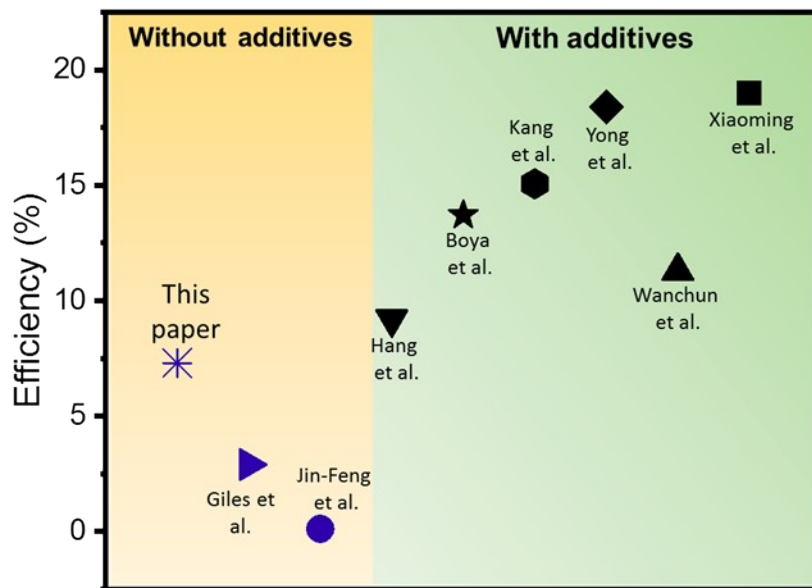

**Figure S7.** Graph of the efficiency without (yellow) and with additives (green) for CsPbI<sub>3</sub> based SCs

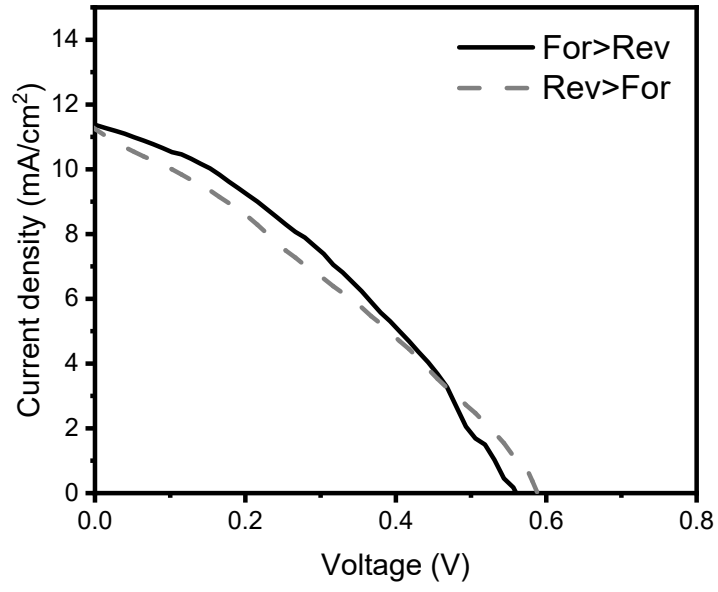

**Fig S8.** Current-voltage curves for forward and reverse scans
